# Supplementary material for: A combined computational and experimental study of methane activation during oxidative coupling of methane (OCM) by surface metal oxide catalysts
Source: Royal Society of Chemistry journal article supplement (doi:10.1039/d1sc02174e), 2021-01-01
Supplement: d1sc02174e1.pdf [file d1sc02174e1.pdf]

## A Combined Computational and Experimental Study of Methane Activation during Oxidative Coupling of Methane (OCM) by Surface Metal Oxide Catalysts

Daniyal Kiani, Sagar Sourav, Israel E. Wachs\* and Jonas Baltrusaitis\*

Department of Chemical and Biomolecular Engineering, Lehigh University, B336 Iacocca Hall, 111 Research Drive, Bethlehem, PA 18015, USA

\* Corresponding author: [job314@lehigh.edu](mailto:job314@lehigh.edu), [iew0@lehigh.edu](mailto:iew0@lehigh.edu)

**Table S1.** Calculated values for  $\mu\text{O}(T, p)$  in eV, referenced to 300K, 101325Pa (1atm) highlighted in red.

|             | <b>1.00<br/>E-10</b> | <b>0.1</b> | <b>0.15</b> | <b>0.2</b> | <b>0.25</b> | <b>0.3</b> | <b>0.35</b> | <b>0.4</b> | <b>1</b>    | <b>1.00E<br/>+10</b> |
|-------------|----------------------|------------|-------------|------------|-------------|------------|-------------|------------|-------------|----------------------|
| <b>300</b>  | -0.30                | -0.03      | -0.02       | -0.02      | -0.02       | -0.02      | -0.01       | -0.01      | <b>0.00</b> | 0.30                 |
| <b>350</b>  | -0.41                | -0.10      | -0.09       | -0.09      | -0.08       | -0.08      | -0.08       | -0.08      | -0.06       | 0.29                 |
| <b>400</b>  | -0.52                | -0.16      | -0.16       | -0.15      | -0.15       | -0.14      | -0.14       | -0.14      | -0.12       | 0.27                 |
| <b>450</b>  | -0.63                | -0.23      | -0.22       | -0.22      | -0.21       | -0.21      | -0.21       | -0.21      | -0.19       | 0.26                 |
| <b>500</b>  | -0.75                | -0.30      | -0.29       | -0.29      | -0.28       | -0.28      | -0.28       | -0.27      | -0.25       | 0.24                 |
| <b>600</b>  | -0.98                | -0.44      | -0.43       | -0.43      | -0.42       | -0.42      | -0.41       | -0.41      | -0.38       | 0.21                 |
| <b>700</b>  | -0.98                | -0.59      | -0.58       | -0.57      | -0.56       | -0.56      | -0.55       | -0.55      | -0.52       | 0.17                 |
| <b>800</b>  | -1.21                | -0.74      | -0.72       | -0.71      | -0.71       | -0.70      | -0.69       | -0.69      | -0.66       | 0.13                 |
| <b>900</b>  | -1.45                | -0.89      | -0.87       | -0.86      | -0.85       | -0.85      | -0.84       | -0.83      | -0.80       | 0.09                 |
| <b>1000</b> | -1.69                | -1.04      | -1.02       | -1.01      | -1.00       | -0.99      | -0.99       | -0.98      | -0.94       | 0.05                 |
| <b>1100</b> | -1.93                | -1.20      | -1.18       | -1.16      | -1.15       | -1.14      | -1.14       | -1.13      | -1.09       | 0.00                 |
| <b>1200</b> | -2.18                | -1.35      | -1.33       | -1.32      | -1.31       | -1.30      | -1.29       | -1.28      | -1.23       | -0.04                |
| <b>1300</b> | -2.43                | -1.51      | -1.49       | -1.47      | -1.46       | -1.45      | -1.44       | -1.44      | -1.38       | -0.09                |

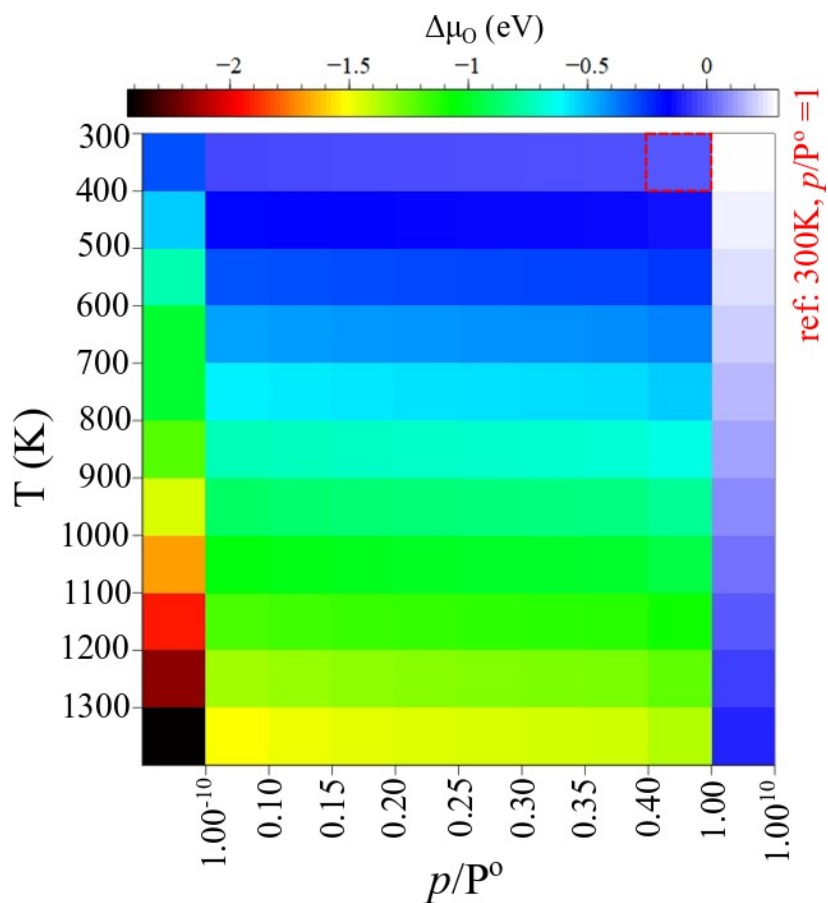

**Figure S1.**  $\mu_O(T,P)$  taken from table S1, calculated according to eq(4) shown in experimental section.

The positive values for “O<sub>2</sub> balance” in **Table S2** indicate that oxygen needs to be added into the system to form the respective Mn<sub>a</sub>O<sub>b</sub> cluster, while a negative value signifies release of O<sub>2</sub> from the solid to the gas-phase.

**Table S2.** Calculated parameters from general stoichiometry equation for various Mn<sub>a</sub>O<sub>b</sub> clusters.

| Cluster Stoichiometry          | a = Mn atoms in the cluster | b = O atoms in the cluster | Fraction of Mn <sub>2</sub> O <sub>3</sub> = (a/32) | O <sub>2</sub> balance = b – 48(a/32) |
|--------------------------------|-----------------------------|----------------------------|-----------------------------------------------------|---------------------------------------|
| MnO                            | 1                           | 1                          | 0.03125                                             | -0.5                                  |
| MnO <sub>2</sub>               | 1                           | 2                          | 0.03125                                             | 0.5                                   |
| MnO <sub>3</sub>               | 1                           | 3                          | 0.03125                                             | 1.5                                   |
| Mn <sub>2</sub> O              | 2                           | 1                          | 0.0625                                              | -2                                    |
| Mn <sub>2</sub> O <sub>2</sub> | 2                           | 2                          | 0.0625                                              | -1                                    |
| Mn <sub>2</sub> O <sub>3</sub> | 2                           | 3                          | 0.0625                                              | 0                                     |
| Mn <sub>2</sub> O <sub>4</sub> | 2                           | 4                          | 0.0625                                              | 1                                     |
| Mn <sub>2</sub> O <sub>5</sub> | 2                           | 5                          | 0.0625                                              | 2                                     |

**Bader charge-oxidation state correlation using bulk reference compounds.** Often, calculated values of Bader charges, especially transitional metals, are reported in the literature as misnomers for formal oxidation states. While Bader charge and oxidation state are indirectly related, Bader charges cannot be explicitly used as oxidation state. To ascertain oxidation state of a metal center from its Bader charge, the calculated data needs to be calibrated with compounds where formal oxidation state is experimentally known. Using the calibrated correlation then, one can back out oxidation state of a metal center from its Bader charge value, which has been demonstrated implicitly in various literature reports.<sup>10</sup> This approach of data calibration was used to generate linear correlations, shown below, for both Mn and W centers, so their formal oxidation state under various conditions could be ascertained from the Bader charge calculation. Reference compounds used for each case are labelled on the plot in **Figure S2**.

| oxidation state | calculated Bader charge |
|-----------------|-------------------------|
| Mn              |                         |
| 3               | 1.61                    |
| 2.67            | 1.51                    |
| 2               | 1.43                    |
| 0               | 0                       |
| W               |                         |
| 6               | 2.56                    |
| 4               | 2.01                    |
| 0               | 0                       |

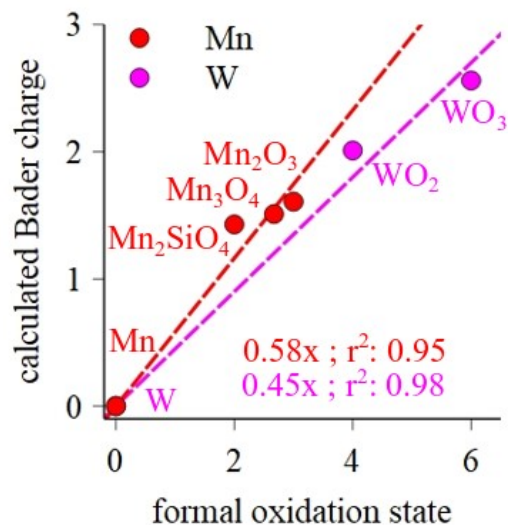

**Figure S2.** Linear correlation of calculated Bader charge values with formal oxidation state of transition metals using bulk reference compounds.

**Table S3.** Summary of various pathways studied for CH<sub>4</sub> dissociation over Na<sub>2</sub>WO<sub>4</sub> surface sites.

| CH <sub>4</sub> dissociation pathways over Na <sub>2</sub> WO <sub>4</sub> /SiO <sub>2</sub> catalyst |       |            |
|-------------------------------------------------------------------------------------------------------|-------|------------|
| TS                                                                                                    | Final | Descriptor |

|   |                                                                                     |                                                                                      |                  |
|---|-------------------------------------------------------------------------------------|--------------------------------------------------------------------------------------|------------------|
| 1 | 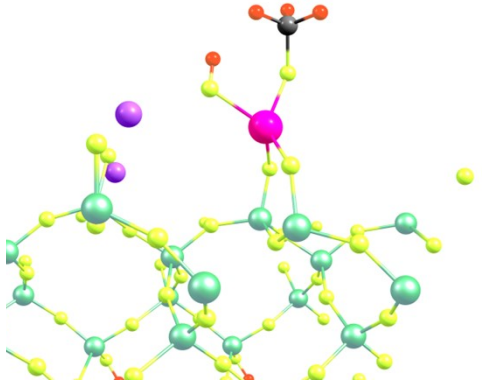   |    | W_OCH3_OH_N<br>a |
| 2 |    |    | b_H_W_OCH3       |
| 3 |  |  | H_W_OCH3         |
| 4 | Shown in main file-dominant pathway                                                 |                                                                                      |                  |

**Table S4.** Summary of various pathways studied for CH<sub>4</sub> dissociation over Mn<sub>2</sub>O<sub>5</sub>-Na<sub>2</sub>WO<sub>4</sub> surface sites.

| CH <sub>4</sub> dissociation pathways over Mn <sub>2</sub> O <sub>5</sub> -Na <sub>2</sub> WO <sub>4</sub> /SiO <sub>2</sub> catalyst : WO <sub>5</sub> moiety |    |       |            |
|----------------------------------------------------------------------------------------------------------------------------------------------------------------|----|-------|------------|
| #                                                                                                                                                              | TS | Final | Descriptor |
|                                                                                                                                                                |    |       |            |

|                      |                                                                                     |                                                                                      |               |
|----------------------|-------------------------------------------------------------------------------------|--------------------------------------------------------------------------------------|---------------|
| 1                    | 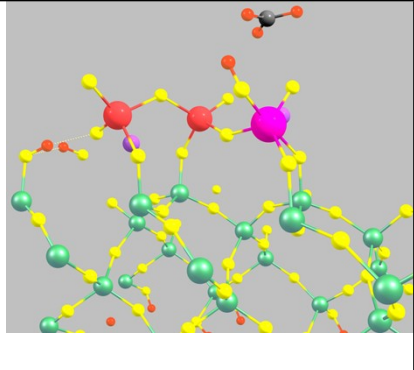   |    | WO_CH3_OH     |
| 2                    |    |    | W_CH3_OH      |
| <b>W-O-Mn moiety</b> |                                                                                     |                                                                                      |               |
| 3                    |  |  | W_CH3_OH_b    |
| 4                    |  |  | W_OCH3_OH_Mn1 |

|                                           |                                                                                     |                                                                                      |                                    |
|-------------------------------------------|-------------------------------------------------------------------------------------|--------------------------------------------------------------------------------------|------------------------------------|
| 5                                         | 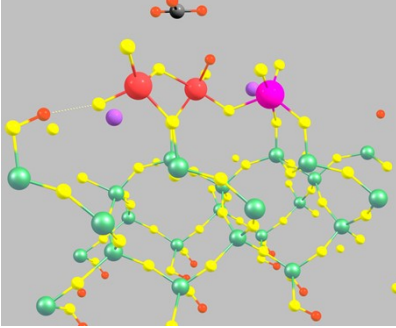   |    | <p>b_Mn1_OCH3_Mn1_O</p> <p>H_W</p> |
| <b>Mn<sub>2</sub>O<sub>5</sub> Moiety</b> |                                                                                     |                                                                                      |                                    |
| 6                                         |    |    | <p>Mn2_OCH3_OH</p>                 |
| 7                                         |  |  | <p>B_Mn2_OCH3_OH</p>               |
| 8                                         |  |  | <p>B_Mn2_OCH3_Mn1-<br/>2_OH</p>    |
| 9                                         | <p>Shown in main file-dominant pathway</p>                                          |                                                                                      |                                    |



|                |                                                                                    |                                                                                     |                               |
|----------------|------------------------------------------------------------------------------------|-------------------------------------------------------------------------------------|-------------------------------|
| <p>1<br/>0</p> | 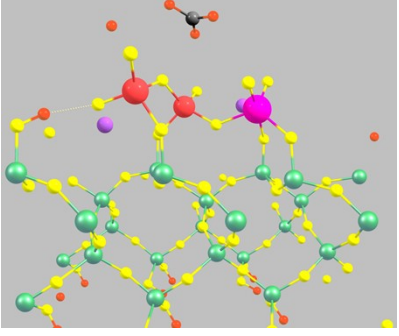  |   | <p>Mn1-<br/>2_OCH3_Mn2_OH</p> |
| <p>1<br/>1</p> |   |   | <p>Mn2_H_OCH3</p>             |
| <p>1<br/>2</p> |  |  | <p>Mn2_CH3_OH</p>             |

## Optimized POSCAR of Mn<sub>2</sub>O<sub>5</sub>-Na<sub>2</sub>WO<sub>4</sub>/SiO<sub>2</sub>

```
Si O H W Na Mn
1.000000000000000
15.208000000000002 0.000000000000000 0.000000000000000
0.000000000000000 10.138700000000000 0.000000000000000
0.000000000000000 0.000000000000000 28.000000000000000
Si O H W Na Mn
24 64 14 1 2 2
```

Selective dynamics

Direct

```
0.9999066279999980 0.2500843300000000 0.3297078570000025 F F F
0.3332397420000035 0.2500843300000000 0.3297078570000025 F F F
0.6665735139999995 0.2500843300000000 0.3297078570000025 F F F
0.9999066279999980 0.7500833439999965 0.3297078570000025 F F F
0.3332397420000035 0.7500833439999965 0.3297078570000025 F F F
0.6665735139999995 0.7500833439999965 0.3297078570000025 F F F
0.1665728560000019 0.2500843300000000 0.3956921429999980 F F F
0.4999066279999980 0.2500843300000000 0.3956921429999980 F F F
0.8332404000000011 0.2500843300000000 0.3956921429999980 F F F
0.1665728560000019 0.7500833439999965 0.3956921429999980 F F F
0.4999066279999980 0.7500833439999965 0.3956921429999980 F F F
0.8332404000000011 0.7500833439999965 0.3956921429999980 F F F
0.1532268054213830 0.9967523311787900 0.4634250744653130 T T T
0.4879422218042109 0.9974407486753947 0.4635169541107658 T T T
0.8193699529735241 0.9968319137017616 0.4628062722268140 T T T
0.1793058062795225 0.5043578577506977 0.4645781299298974 T T T
0.5102187620006120 0.5041927658054774 0.4618209557183022 T T T
0.8426041478787027 0.5025772817025000 0.4624893568326343 T T T
0.9892929645618622 0.9010562125522554 0.5155577803823306 T T T
0.3234166717243880 0.9052169313888783 0.5148994529110169 T T T
0.6570521189737022 0.9076782773248198 0.5189759170597625 T T T
0.0054896735953065 0.5969326676573772 0.5139079667169000 T T T
0.3426610528344796 0.6059482016061821 0.5180251958292033 T T T
0.6714991466819171 0.5946038828055293 0.5172174249893970 T T T
0.5577081614557571 0.5243663579551026 0.6574263038939421 T T T
0.5114062682617941 0.7110963957290792 0.5938477735051819 T T T
0.6712020141537920 0.7481070138235566 0.6530909056692806 T T T
```



|                    |                    |                    |   |   |   |
|--------------------|--------------------|--------------------|---|---|---|
| 0.7459980031478608 | 0.9917209788932340 | 0.6626507496394041 | T | T | T |
| 0.8274751546374404 | 0.8060297169546118 | 0.6072580795792533 | T | T | T |
| 0.9721541290000033 | 0.1250850699999972 | 0.2967157140000012 | F | F | F |
| 0.0276591269999997 | 0.3750835909999992 | 0.2967157140000012 | F | F | F |
| 0.3054865860000007 | 0.1250850699999972 | 0.2967157140000012 | F | F | F |
| 0.3609928979999992 | 0.3750835909999992 | 0.2967157140000012 | F | F | F |
| 0.6388203579999967 | 0.1250850699999972 | 0.2967157140000012 | F | F | F |
| 0.6943266700000024 | 0.3750835909999992 | 0.2967157140000012 | F | F | F |
| 0.9721541290000033 | 0.6250830970000010 | 0.2967157140000012 | F | F | F |
| 0.0276591269999997 | 0.8750826039999993 | 0.2967157140000012 | F | F | F |
| 0.3054865860000007 | 0.6250830970000010 | 0.2967157140000012 | F | F | F |
| 0.3609928979999992 | 0.8750826039999993 | 0.2967157140000012 | F | F | F |
| 0.6388203579999967 | 0.6250830970000010 | 0.2967157140000012 | F | F | F |
| 0.6943266700000024 | 0.8750826039999993 | 0.2967157140000012 | F | F | F |
| 0.0832397420000035 | 0.2084547330000035 | 0.3626999999999967 | F | F | F |
| 0.2499066279999980 | 0.2917139280000001 | 0.3626999999999967 | F | F | F |
| 0.4165735139999995 | 0.2084547330000035 | 0.3626999999999967 | F | F | F |
| 0.5832397420000035 | 0.2917139280000001 | 0.3626999999999967 | F | F | F |
| 0.7499066279999980 | 0.2084547330000035 | 0.3626999999999967 | F | F | F |
| 0.9165735139999995 | 0.2917139280000001 | 0.3626999999999967 | F | F | F |
| 0.0832397420000035 | 0.7084537470000001 | 0.3626999999999967 | F | F | F |
| 0.2499066279999980 | 0.7917129419999966 | 0.3626999999999967 | F | F | F |
| 0.4165735139999995 | 0.7084537470000001 | 0.3626999999999967 | F | F | F |
| 0.5832397420000035 | 0.7917129419999966 | 0.3626999999999967 | F | F | F |
| 0.7499066279999980 | 0.7084537470000001 | 0.3626999999999967 | F | F | F |
| 0.9165735139999995 | 0.7917129419999966 | 0.3626999999999967 | F | F | F |
| 0.1803880974439807 | 0.1250385524243995 | 0.4319223440802347 | T | T | T |
| 0.1533858960287589 | 0.3743642848600928 | 0.4329864643084775 | T | T | T |
| 0.5169524158426810 | 0.1248384898947137 | 0.4317339619186455 | T | T | T |
| 0.4829403232376848 | 0.3737579362334742 | 0.4317242006050535 | T | T | T |
| 0.8491731693124009 | 0.1259435548661472 | 0.4321572716972852 | T | T | T |
| 0.8137210852486447 | 0.3743426602613980 | 0.4318925443226291 | T | T | T |
| 0.1922798097670295 | 0.6245441425204703 | 0.4274528860832518 | T | T | T |
| 0.1389926864801154 | 0.8754875263136341 | 0.4270224076210525 | T | T | T |
| 0.5302757977268016 | 0.6224270907924492 | 0.4250225326535784 | T | T | T |
| 0.4743103305639451 | 0.8737873167745747 | 0.4280163025467374 | T | T | T |
| 0.8594128970590660 | 0.6240826046018739 | 0.4269585622579868 | T | T | T |
| 0.8049510725429343 | 0.8752011898692018 | 0.4266663023177699 | T | T | T |
| 0.0616032809748930 | 0.0039326235984447 | 0.4940455304121585 | T | T | T |
| 0.2280709629079354 | 0.9672279799837966 | 0.5028427626915075 | T | T | T |
| 0.3947098838713288 | 0.0093422901673748 | 0.4919525105781233 | T | T | T |
| 0.5615106165227814 | 0.9641065381969085 | 0.5036895347212393 | T | T | T |
| 0.7273815352718955 | 0.0063650597205651 | 0.4922616925852594 | T | T | T |
| 0.8941599358585250 | 0.9615052963847148 | 0.5018467150671952 | T | T | T |
| 0.1002320491231714 | 0.5346066241777052 | 0.5023932943485079 | T | T | T |
| 0.2675647616818182 | 0.5017716045951133 | 0.4974564198453635 | T | T | T |
| 0.4339100437087140 | 0.5403055021549932 | 0.4987769517201244 | T | T | T |
| 0.6017375003938525 | 0.4934152900152711 | 0.4928190843512539 | T | T | T |
| 0.7698725258062638 | 0.5399169756135649 | 0.5033104127433106 | T | T | T |
| 0.9338526294576042 | 0.4906856437137179 | 0.4928655380493154 | T | T | T |

|                    |                    |                    |   |   |   |
|--------------------|--------------------|--------------------|---|---|---|
| 0.9995672101362985 | 0.7494565638228394 | 0.4937632176999003 | T | T | T |
| 0.9950564357315343 | 0.8876849337344197 | 0.5741062019086840 | T | T | T |
| 0.3314026214241181 | 0.7547103754511255 | 0.4933317241002513 | T | T | T |
| 0.3335550461648111 | 0.8978344377817749 | 0.5728907284468079 | T | T | T |
| 0.6642584483457057 | 0.7505253120245214 | 0.5020192184169403 | T | T | T |
| 0.6667260139778293 | 0.9155092641003364 | 0.5765014802014008 | T | T | T |
| 0.9833161514753925 | 0.6038030177681009 | 0.5719337283023265 | T | T | T |
| 0.3482760058060350 | 0.6226518790011610 | 0.5748812569596282 | T | T | T |
| 0.3600077287429926 | 0.7148893706922479 | 0.6647031200187925 | T | T | T |
| 0.4571564998027569 | 0.9316070491133459 | 0.6429528523372738 | T | T | T |
| 0.6734925507395602 | 0.5792829089434477 | 0.5757751142218268 | T | T | T |
| 0.9366136240000031 | 0.1554933079999969 | 0.2701178570000025 | F | F | F |
| 0.9751808259999990 | 0.4167210789999984 | 0.2840807139999981 | F | F | F |
| 0.2699736980000011 | 0.1554696359999994 | 0.2701382139999993 | F | F | F |
| 0.3085132819999998 | 0.4167220650000019 | 0.2840807139999981 | F | F | F |
| 0.6032976070000018 | 0.1554785129999985 | 0.2701307139999969 | F | F | F |
| 0.6418325879999998 | 0.4167329140000007 | 0.2840771429999975 | F | F | F |
| 0.9366418990000014 | 0.6554676639999997 | 0.2701389289999980 | F | F | F |
| 0.9751663600000029 | 0.9167309420000009 | 0.2840775000000022 | F | F | F |
| 0.2699644919999997 | 0.6554765400000022 | 0.2701314290000028 | F | F | F |
| 0.3085152550000032 | 0.9167191060000022 | 0.2840810710000028 | F | F | F |
| 0.6033081269999983 | 0.6554686500000031 | 0.2701385709999968 | F | F | F |
| 0.6418470540000030 | 0.9167210789999984 | 0.2840807139999981 | F | F | F |
| 0.9370657765877155 | 0.8861482815335364 | 0.5901160927725044 | T | T | T |
| 0.0012684999754811 | 0.6897596956007064 | 0.5852640079882363 | T | T | T |
| 0.4064800213067699 | 0.7980229958050487 | 0.6157519282677413 | T | T | T |
| 0.3975635739783385 | 0.5015493057527109 | 0.6377618729824945 | T | T | T |
| 0.8313157653449252 | 0.5842250477547424 | 0.5875029276123769 | T | T | T |
| 0.6008541985120175 | 0.6352965010988001 | 0.6230112561895851 | T | T | T |
| 0.7345182862766747 | 0.8721123825800773 | 0.6253228052671211 | T | T | T |
